# Supplementary material for: Synthesis, characterization and adsorption capacity of magnetic carbon composites activated by CO2: implication for the catalytic mechanisms of iron salts
Source: Royal Society of Chemistry journal article supplement (doi:10.1039/c6ta06614c), 2016-01-01
Supplement: c6ta06614c2.pdf [file c6ta06614c2.pdf]

## Supporting Information

### Tables

# **Synthesis, characterization and adsorption capacity of magnetic carbon composites activated by CO<sub>2</sub>: implication to the catalytic mechanisms of iron salts**

Feng Qian,<sup>1</sup> Xiangdong Zhu,<sup>1,\*</sup> Yuchen Liu,<sup>1</sup> Shilai Hao,<sup>1</sup> Zhiyong Jason Ren,<sup>2</sup> Bin Gao,<sup>3</sup>

Ruilong Zong,<sup>4</sup> Shicheng Zhang,<sup>1,\*</sup> Jianmin Chen<sup>1</sup>

<sup>1</sup> Shanghai Key Laboratory of Atmospheric Particle Pollution and Prevention (LAP3), Department of Environmental Science and Engineering, Fudan University, Shanghai 200433, China

<sup>2</sup> Department of Civil, Environmental, and Architectural Engineering, University of Colorado Boulder, Boulder, CO 80309, United States

<sup>3</sup> Department of Agricultural and Biological Engineering, University of Florida, Gainesville, Florida 32611, United States

<sup>4</sup> Department of Chemistry, Tsinghua University, Beijing 100084, China

\* Corresponding author, Tel/fax: +86-21-65642297; E-mail: [zxdjewett@fudan.edu.cn](mailto:zxdjewett@fudan.edu.cn) (Xiangdong Zhu), [zhangsc@fudan.edu.cn](mailto:zhangsc@fudan.edu.cn) (Shicheng Zhang).

**Table S1** Condition of mobile phase and wavelength of eight PPCPs in HPLC analysis

| PPCP                    | Wavelength (nm) | Mobile Phase                    | Volume Ratio |
|-------------------------|-----------------|---------------------------------|--------------|
| sulfamethoxazole (SMX)  | 265             |                                 | 67:33        |
| sulfapyridine (SPY)     | 265             | TFA (0.1%) <sup>a</sup> : water | 62:38        |
| carbamazepine (CMZ)     | 285             |                                 | 80:20        |
| sulfathiazole (STZ)     | 265             |                                 | 80:20        |
| diclofenac sodium (DCF) | 276             | TFA (0.1%):<br>methanol         | 10:90        |
| quinindium (QND)        | 245             |                                 | 62:38        |
| bisphenol A (BPA)       | 280             | methanol: water                 | 75:25        |
| triclosan (TCS)         | 280             |                                 | 90:10        |

<sup>a</sup> TFA: trifluoroacetic acid.

**Table S2** Surface areas and porosities of MCs derived from different iron salt type (750°C of activation temperature and 2 h of hold time)

| Sample         | $S_{\text{BET}}^a$<br>(m <sup>2</sup> /g) | $S_{\text{mic}}^b$<br>(m <sup>2</sup> /g) | $S_{\text{mic}}/S_{\text{BET}}$<br>(%) | $V_{\text{mic}}^c$<br>(cm <sup>3</sup> /g) | $V_{\text{t}}^d$<br>(cm <sup>3</sup> /g) | $V_{\text{mic}}/V_{\text{t}}$<br>(%) |
|----------------|-------------------------------------------|-------------------------------------------|----------------------------------------|--------------------------------------------|------------------------------------------|--------------------------------------|
| <i>MC-Cl-5</i> | 703.0                                     | 509                                       | 72.4                                   | 0.225                                      | 0.408                                    | 55.1                                 |
| <i>MC-Ox-5</i> | 393.0                                     | 331                                       | 84.2                                   | 0.165                                      | 0.296                                    | 55.7                                 |
| <i>MC-N-5</i>  | 345.0                                     | 315                                       | 91.3                                   | 0.158                                      | 0.216                                    | 73.1                                 |
| <i>MC-S-5</i>  | 247.0                                     | 201                                       | 81.4                                   | 0.105                                      | 0.144                                    | 72.9                                 |
| <i>MC-Ci-5</i> | 60.0                                      | 46                                        | 76.7                                   | 0.023                                      | 0.053                                    | 43.4                                 |

<sup>a</sup> Brunauer-Emmett-Teller (BET) surface area measured using N<sub>2</sub> adsorption at  $P/P_0$  of 0.04-0.3.

<sup>b</sup> Micropore surface area calculated using the  $t$ -plot method.

<sup>c</sup> Micropore volume calculated using the  $t$ -plot method.

<sup>d</sup> Total pore volume determined at  $P/P_0 = 0.99$ .

**Table S3** Yields, ash, Fe contents, and elemental compositions for MCs derived from different iron salt types (750°C of activation temperature and 2 h of hold time)

| Sample         | Yield (%) | Ash (%) | Fe (%) | C (%) | N (%) | H (%)            | Carbon Retention (%) <sup>b</sup> |
|----------------|-----------|---------|--------|-------|-------|------------------|-----------------------------------|
| <i>MC-Cl-5</i> | 26.6      | 39.05   | 28.67  | 37.98 | 0.55  | BDL <sup>a</sup> | 15.76                             |
| <i>MC-Ox-5</i> | 31.8      | 31.49   | 20.64  | 48.97 | 0.49  | BDL              | 24.32                             |
| <i>MC-N-5</i>  | 34.1      | 29.84   | 24.32  | 44.48 | 0.64  | BDL              | 23.68                             |
| <i>MC-S-5</i>  | 32.1      | 40.18   | 24.90  | 41.23 | 0.29  | BDL              | 20.63                             |
| <i>MC-Ci-5</i> | 24.1      | 95.79   | 51.78  | 4.17  | 0.04  | BDL              | 1.57                              |

<sup>a</sup> BDL: below detectable level.

$${}^b \text{Carbon retention (\%)} = \frac{M_{\text{sample}} \times C_{\text{sample}}}{M_{\text{hydrochar}} \times C_{\text{hydrochar}}}$$

where  $M_{\text{sample}}$  is the final mass (g) of sample;  $M_{\text{hydrochar}}$  is the mass (g) of hydrochar added;  $C_{\text{sample}}$  and  $C_{\text{hydrochar}}$  are carbon contents (%) of sample and hydrochar, respectively. ( $M_{\text{hydrochar}} = 3$  g;  $C_{\text{hydrochar}} = 64.07$  %)

**Table S4** Mössbauer parameters at room temperature of as-prepared MCs derived from different iron salt types (750°C of activation temperature and 2 h of hold time)

| Sample         | Component                                                 | HMF (KOe) <sup>a</sup> | IS (mm/s) <sup>b</sup> | QS (mm/s) <sup>c</sup> | $\Gamma/2$ (mm/s) <sup>d</sup> | Mole percentage (%) |
|----------------|-----------------------------------------------------------|------------------------|------------------------|------------------------|--------------------------------|---------------------|
| <i>MC-Ox-5</i> | Fe <sub>3</sub> O <sub>4</sub>                            | 459.63                 | 0.54                   | 0                      | 0.27                           | 43.1                |
|                |                                                           | 497.15                 | 0.16                   | 0.05                   | 0.26                           | 56.9                |
| <i>MC-N-5</i>  | Fe <sub>3</sub> O <sub>4</sub>                            | 461.43                 | 0.69                   | 0                      | 0.21                           | 41.9                |
|                |                                                           | 497.79                 | 0.29                   | 0.03                   | 0.22                           | 58.1                |
| <i>MC-S-5</i>  | $\alpha$ -Fe <sub>2</sub> O <sub>3</sub> (s) <sup>e</sup> | 0                      | 0.49                   | 0.67                   | 0.24                           | 15.2                |
|                | Fe <sub>3</sub> O <sub>4</sub>                            | 462.86                 | 0.88                   | 0                      | 0.26                           | 50.2                |
|                |                                                           | 489.22                 | 0.39                   | 0.10                   | 0.16                           | 34.6                |
| <i>MC-Ci-5</i> | Fe <sub>3</sub> O <sub>4</sub>                            | 458.64                 | 0.51                   | 0                      | 0.31                           | 59.6                |
|                |                                                           | 493.93                 | 0.14                   | 0.03                   | 0.20                           | 40.4                |

<sup>a</sup> HMF: hyperfine magnetic fields.

<sup>b</sup> IS: isomer shift.

<sup>c</sup> QS: quadrupole splitting.

<sup>d</sup>  $\Gamma/2$ : half line width.

<sup>e</sup> s: superparamagnetic.

**Table S5** Fe content analyses during acid leaching experiments at pH 2 for MCs activated at different iron salt types (750°C of activation temperature and 2 h of hold time)

| Sample         | Fe Leaching Concentration (mg/L) | Fe Leaching Percentage (%) |
|----------------|----------------------------------|----------------------------|
| <i>MC-Cl-5</i> | 4.13 ± 0.06                      | 0.72 ± 0.01                |
| <i>MC-Ox-5</i> | 1.92 ± 0.03                      | 0.47 ± 0.01                |
| <i>MC-N-5</i>  | 2.97 ± 0.01                      | 0.61 ± 0.01                |
| <i>MC-S-5</i>  | 32.32 ± 0.38                     | 6.49 ± 0.08                |
| <i>MC-Ci-5</i> | 2.82 ± 0.02                      | 0.27 ± 0.01                |

**Table S6** Yields, ash, Fe contents, and elemental compositions for the MCs derived from different FeCl<sub>3</sub> loading content (750°C of activation temperature and 2 h of hold time)

| Sample          | Yield (%) | Ash (%) | Fe (%) | C (%) | N (%)            | H (%) | Carbon Retention (%) <sup>b</sup> |
|-----------------|-----------|---------|--------|-------|------------------|-------|-----------------------------------|
| <i>MC-CI-0</i>  | 36.9      | 10.13   | -      | 71.43 | 1.04             | BDL   | 41.09                             |
| <i>MC-CI-1</i>  | 17.0      | 21.64   | 8.14   | 53.66 | 0.86             | BDL   | 14.24                             |
| <i>MC-CI-2</i>  | 25.2      | 22.39   | 11.43  | 54.04 | 0.73             | BDL   | 21.21                             |
| <i>MC-CI-5</i>  | 25.7      | 51.23   | 29.12  | 35.54 | 0.53             | BDL   | 14.23                             |
| <i>MC-CI-10</i> | 31.6      | 80.61   | 45.51  | 19.07 | 0.32             | BDL   | 9.41                              |
| <i>MC-CI-20</i> | 35.6      | 93.43   | 59.70  | 0.15  | BDL <sup>a</sup> | BDL   | 0.08                              |

<sup>a</sup> BDL: below detectable level.

$$^b \text{ Carbon retention (\%)} = \frac{M_{\text{sample}} \times C_{\text{sample}}}{M_{\text{hydrochar}} \times C_{\text{hydrochar}}}$$

where  $M_{\text{sample}}$  is the final mass (g) of sample;  $M_{\text{hydrochar}}$  is the mass (g) of hydrochar added;  $C_{\text{sample}}$  and  $C_{\text{hydrochar}}$  are carbon contents (%) of sample and hydrochar, respectively. ( $M_{\text{hydrochar}} = 3$  g;  $C_{\text{hydrochar}} = 64.07$  %)

**Table S7** Surface areas and porosities of MCs derived from different FeCl<sub>3</sub> loading content (750°C of activation temperature and 2 h of hold time)

| Sample          | $S_{\text{BET}}^a$<br>(m <sup>2</sup> /g) | $S_{\text{mic}}^b$<br>(m <sup>2</sup> /g) | $S_{\text{mic}}/S_{\text{BET}}$<br>(%) | $V_{\text{mic}}^c$<br>(cm <sup>3</sup> /g) | $V_{\text{t}}^d$<br>(cm <sup>3</sup> /g) | $V_{\text{mic}}/V_{\text{t}}$<br>(%) |
|-----------------|-------------------------------------------|-------------------------------------------|----------------------------------------|--------------------------------------------|------------------------------------------|--------------------------------------|
| <i>MC-Cl-0</i>  | 539.9                                     | 502                                       | 93.0                                   | 0.224                                      | 0.253                                    | 88.5                                 |
| <i>MC-Cl-1</i>  | 908.0                                     | 806                                       | 88.8                                   | 0.402                                      | 0.547                                    | 73.5                                 |
| <i>MC-Cl-2</i>  | 648.0                                     | 560                                       | 86.4                                   | 0.281                                      | 0.408                                    | 68.9                                 |
| <i>MC-Cl-5</i>  | 733.0                                     | 626                                       | 85.4                                   | 0.312                                      | 0.463                                    | 67.4                                 |
| <i>MC-Cl-10</i> | 385.0                                     | 280                                       | 72.7                                   | 0.137                                      | 0.286                                    | 47.9                                 |
| <i>MC-Cl-20</i> | 1.4                                       | 0                                         | 0.0                                    | 0.001                                      | 0.007                                    | 10.0                                 |

<sup>a</sup> Brunauer-Emmett-Teller (BET) surface area measured using N<sub>2</sub> adsorption at  $P/P_0$  of 0.04-0.3.

<sup>b</sup> Micropore surface area calculated using the  $t$ -plot method.

<sup>c</sup> Micropore volume calculated using the  $t$ -plot method.

<sup>d</sup> Total pore volume determined at  $P/P_0 = 0.99$ .



**Table S8** Mössbauer parameters at room temperature of as-prepared MCs derived from different FeCl<sub>3</sub> loadings (750°C of activation temperature and 2 h of hold time)

| Sample          | Component                                                 | HMF<br>(KOe) <sup>a</sup> | IS<br>(mm/s) <sup>b</sup> | QS<br>(mm/s) <sup>c</sup> | Γ/2<br>(mm/s) <sup>d</sup> | Mole<br>percentage<br>(%) |
|-----------------|-----------------------------------------------------------|---------------------------|---------------------------|---------------------------|----------------------------|---------------------------|
| <i>MC-Cl-1</i>  | $\alpha$ -Fe <sub>2</sub> O <sub>3</sub> (s) <sup>e</sup> | 0                         | 0.42                      | 0.07                      | 0.52                       | 34.5                      |
|                 | Fe <sub>3</sub> O <sub>4</sub>                            | 457.19                    | 0.71                      | 0.04                      | 0.39                       | 44.1                      |
|                 |                                                           | 491.18                    | 0.27                      | 0.02                      | 0.18                       | 21.4                      |
| <i>MC-Cl-2</i>  | $\alpha$ -Fe <sub>2</sub> O <sub>3</sub> (s)              | 0                         | 0.37                      | 0.51                      | 0.27                       | 19.4                      |
|                 | Fe <sub>3</sub> O <sub>4</sub>                            | 457.23                    | 0.79                      | 0.02                      | 0.25                       | 54.3                      |
|                 |                                                           | 488.38                    | 0.41                      | 0.05                      | 0.14                       | 26.3                      |
| <i>MC-Cl-5</i>  | Fe <sub>3</sub> O <sub>4</sub>                            | 458.14                    | 0.68                      | 0                         | 0.28                       | 70.2                      |
|                 |                                                           | 485.87                    | 0.26                      | 0.07                      | 0.15                       | 29.8                      |
| <i>MC-Cl-10</i> | Fe <sub>3</sub> O <sub>4</sub>                            | 460.90                    | 0.83                      | 0                         | 0.24                       | 69.2                      |
|                 |                                                           | 485.55                    | 0.39                      | 0.07                      | 0.13                       | 30.8                      |
| <i>MC-Cl-20</i> | Fe <sub>3</sub> O <sub>4</sub>                            | 465.36                    | 0.60                      | 0                         | 0.19                       | 56.9                      |
|                 |                                                           | 489.45                    | 0.12                      | 0.08                      | 0.17                       | 43.1                      |

<sup>a</sup> HMF: hyperfine magnetic fields.

<sup>b</sup> IS: isomer shift.

<sup>c</sup> QS: quadrupole splitting.

<sup>d</sup> Γ/2: half line width.

<sup>e</sup> s: superparamagnetic.

**Table S9** Fe content analyses during acid leaching experiments at pH 2 for MCs activated at different FeCl<sub>3</sub> loadings (750°C of activation temperature and 2 h of hold time)

| Sample          | Fe Leaching Concentration (mg/L) | Fe Leaching Percentage (%) |
|-----------------|----------------------------------|----------------------------|
| <i>MC-CI-0</i>  | -                                | -                          |
| <i>MC-CI-1</i>  | 3.96 ± 0.02                      | 2.44 ± 0.01                |
| <i>MC-CI-2</i>  | 3.85 ± 0.14                      | 1.68 ± 0.06                |
| <i>MC-CI-5</i>  | 4.34 ± 0.02                      | 0.74 ± 0.01                |
| <i>MC-CI-10</i> | 3.84 ± 0.04                      | 0.42 ± 0.01                |
| <i>MC-CI-20</i> | 3.92 ± 0.50                      | 0.28 ± 0.04                |

**Table S10** Physicochemical properties of PPCPs and  $q_m$  values for PPCP adsorption onto the *MC-Cl-5* sample.

| PPCP                    | $q_m$ (mmol/g) <sup>a</sup> | Log $K_{OW}$ <sup>b</sup> | Melting Points (°C) |
|-------------------------|-----------------------------|---------------------------|---------------------|
| sulfamethoxazole (SMX)  | 0.82                        | 0.89                      | 167                 |
| sulfapyridine (SPY)     | 0.91                        | 0.35                      | 191                 |
| carbamazepine (CMZ)     | 0.72                        | 2.45                      | 190                 |
| sulfathiazole (STZ)     | 0.91                        | 0.05                      | 202                 |
| diclofenac sodium (DCF) | 0.57                        | 3.91                      | 288                 |
| quinindium (QND)        | 0.65                        | 2.88                      | 174                 |
| bisphenol A (BPA)       | 0.86                        | 3.32                      | 150                 |
| triclosan (TCS)         | 1.28                        | 4.76                      | 55                  |

<sup>a</sup>  $q_m$ : the maximum adsorption capacity in Langmuir adsorption model.

<sup>b</sup>  $K_{OW}$ : octanol-water partition coefficient.
